# Supplementary material for: Hybrid-biotaxonomy-like machine learning enables an anticipated surface plasmon resonance of Au/Ag nanoparticles assembled on ZnO nanorods
Source: Royal Society of Chemistry journal article supplement (doi:10.1039/d3ta00324h), 2023-01-01
Supplement: d3ta00324h1.pdf [file d3ta00324h1.pdf]

Supporting information

**Hybrid-biotaxonomy-like machine learning enables an anticipated surface plasmon resonance of Au/Ag nanoparticles assembled on ZnO nanorods**

Yu-Kai Liao<sup>1</sup>, Yi-Sheng Lai<sup>1,2</sup>, Fei Pan<sup>3, #, \*</sup>, Yen-Hsun Su<sup>1,\*</sup>

<sup>1</sup>Department of Materials Science and Engineering, National Cheng Kung University, University Road No.1, 70101 Tainan, Taiwan

<sup>2</sup>Department of Mechanical Engineering, National Chung Cheng University, No.168, Sec. 1, University Rd., Minhsiung, 62102 Chiayi, Taiwan

<sup>3</sup>Department of Health Science and Technology, ETH Zürich, Universitätstrasse 2, 8092 Zürich, Switzerland

\*Correspondence : [fepan@ethz.ch](mailto:fepan@ethz.ch) (F. Pan); [yhsu@mail.ncku.edu.tw](mailto:yhsu@mail.ncku.edu.tw) (Y.-H. Su)

#Present address: Department of Chemistry, University of Basel, Mattenstrasse 24a, 4058 Basel, Switzerland. ([fei.pan@unibas.ch](mailto:fei.pan@unibas.ch))

## **Section S1. The detailed processes to synthesize 5 species of noble metal NPs colloid**

Synthesis of gold nanorods colloid: gold nanorods (AuNRs) were synthesized by a seed-mediated approach. Seed solution was first prepared by adding 0.6 mL 10 mM sodium borohydride into 10 mL aqueous solution containing 0.1 M CTAB and  $5 \times 10^{-4}$  M  $\text{HAuCl}_4$ . Then, the growth solution was prepared by mixing 5-7 mL  $10^{-3}$  M  $\text{HAuCl}_4$  ( $X_2$ ), 5 mL 0.2 M CTAB, 250  $\mu\text{L}$   $4 \times 10^{-3}$  M  $\text{AgNO}_3$ , and 70  $\mu\text{L}$  0.0788 M ascorbic acid with a gentle stirring. Next, 12  $\mu\text{L}$  seed solution was added to the growth solution and left still for 24 h to complete the rod growth. Before use, the AuNRs colloid was centrifugated at 10000 rpm for 40 min and then suspended in ethylene glycol.

Synthesis of Au seeds for ULANPs and S-Au-AgNPs: The Au seed solution was synthesized by the citrate-reduction method. Seed solution was prepared by adding 5 mL 38.8 mM sodium citrate into 50 mL 0.5 mM  $\text{HAuCl}_4$  aqueous solution, which was magnetically stirred at 600 rpm at 100 °C until the solution became red.

Synthesis of urchin-like AuNPs colloid: The 240  $\mu\text{L}$  Au seed solution was firstly added into 120 mL  $10^{-4}$  M  $\text{HAuCl}_4$  stirred at 600 rpm at room temperature for 5 min to form an aqueous solution. Then, 5 mL 38.8 mM sodium citrate was added to the above solution to react for 5 min. Subsequently, 20 mL 30 mM hydroquinone was added to the solution and stirred for 30 min.

Synthesis of S-Au-AgNPs colloid (4<sup>th</sup> layer): The preparation of S-Au-AgNPs colloid was similar to ULANPs colloid. For 4<sup>th</sup> layer S-Au-AgNPs(575), 500  $\mu\text{L}$  Au seed solution and 60 mL 0.1 mM  $\text{AgNO}_3$  were added into 100 mL  $10^{-4}$  M  $\text{HAuCl}_4$ , which was stirred at 600 rpm at room temperature for 5 min to form an aqueous solution. Then, after completely mixing, sodium citrate (38.8 mM, 200  $\mu\text{L}$ ) and hydroquinone aqueous solution (30 mM, 30 mL) was added to the solution one by one, and the solution was stirred for 12 h.

Synthesis of S-Au-AgNPs colloid (5<sup>th</sup> layer): For S-Au-AgNPs(5<sup>th</sup> layer), all the preparation process was analog to the 4<sup>th</sup> layer process. 50  $\mu\text{L}$  Au seed solution and 3-6 mL 0.1 mM  $\text{AgNO}_3$  ( $X_5$ ) were added to 10 mL  $10^{-4}$  M  $\text{HAuCl}_4$ , which was stirred at 600 rpm at room temperature for 5 min to form an aqueous solution. Then, after completely mixing, sodium citrate (38.8 mM, 20  $\mu\text{L}$ ) and hydroquinone aqueous solution (30 mM, 3 mL) was added to the solution one by one, and the solution was stirred for 12 h.

Synthesis of S-AgNPs colloid: 0.5 mM polyvinylpyrrolidone (PVP) powder was first dissolved in 20 mL ethylene glycol. Then,  $\text{AgNO}_3$  powder was added to the PVP solution to form 0.025-0.050 M  $\text{AgNO}_3$  ( $X_6$ ) solution by magnetically stirring until the color changed to yellow. Subsequently, 0.05 M sodium borohydride was added to the above solution and stirred for 30 min.

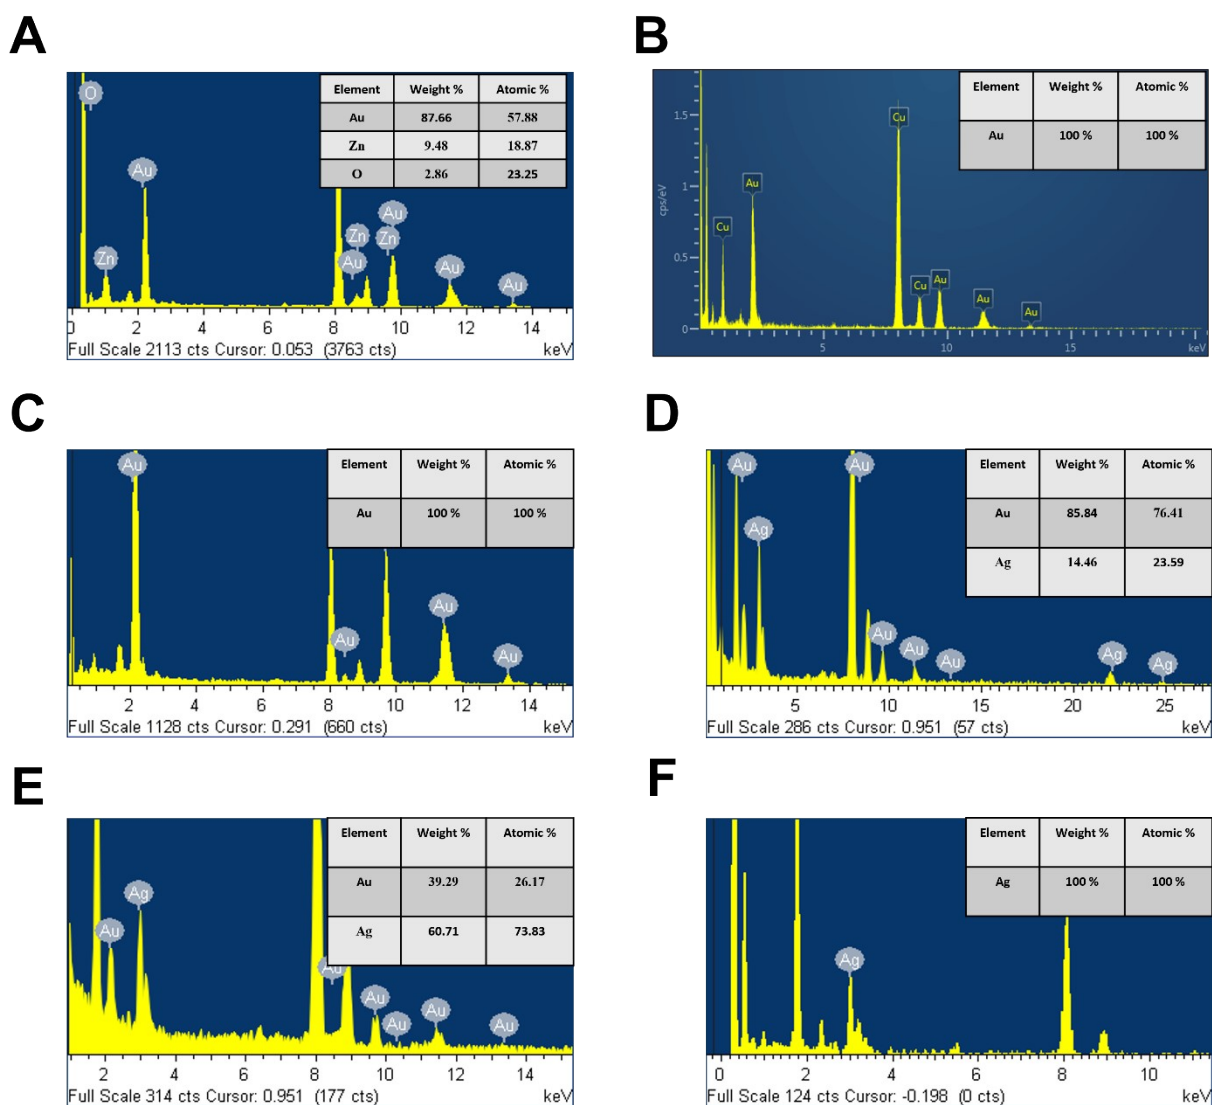

**Fig. S1. Energy dispersive X-ray (EDX) spectrum of six species of NMNPs through transmission electron microscopy (TEM) analysis. (A) S-Au/ZnONRs, (B) AuNRs, (C) ULANPs, (D) S-Au-AgNPs (molar ratio Au/Ag=3), (E) S-Au-AgNPs (molar ratio Au/Ag=1/3), and (F) S-AgNPs.**

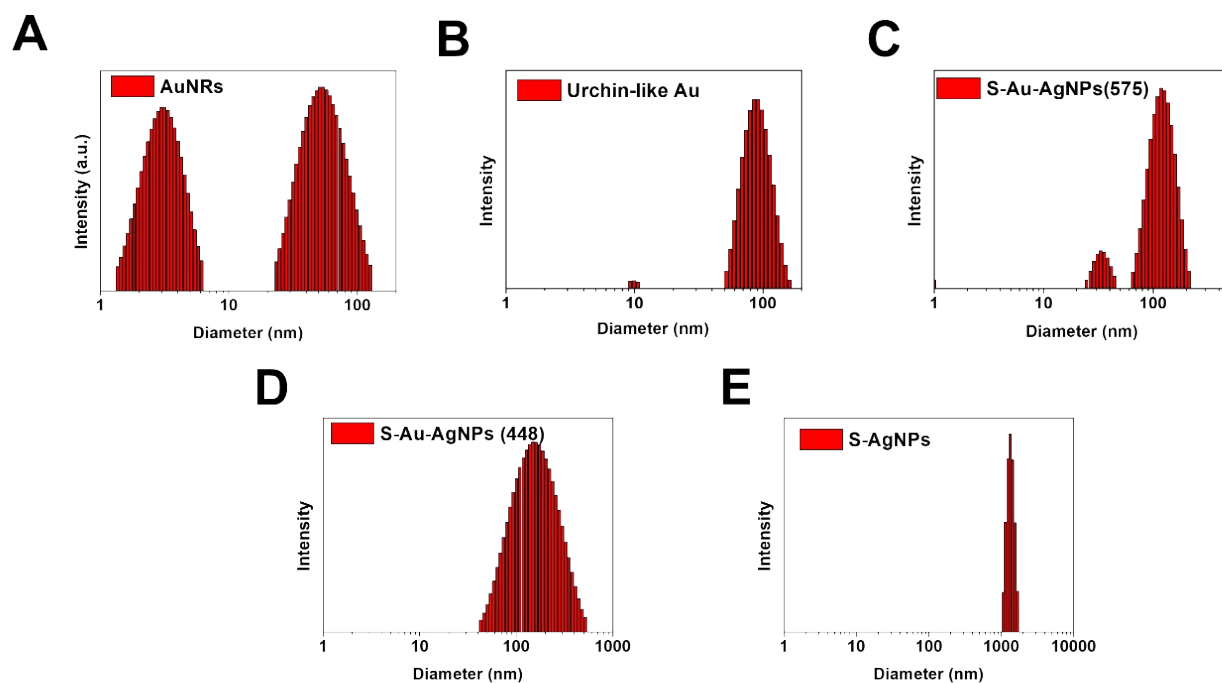

**Fig. S2. Size distribution of five species of NMNPs suspended in the colloid. (A)** AuNRs, **(B)** ULANPs, **(C)** S-Au-AgNPs (molar ratio Au/Ag=3), **(D)** S-Au-AgNPs (molar ratio Au/Ag=1/3), and **(E)** S-AgNPs.

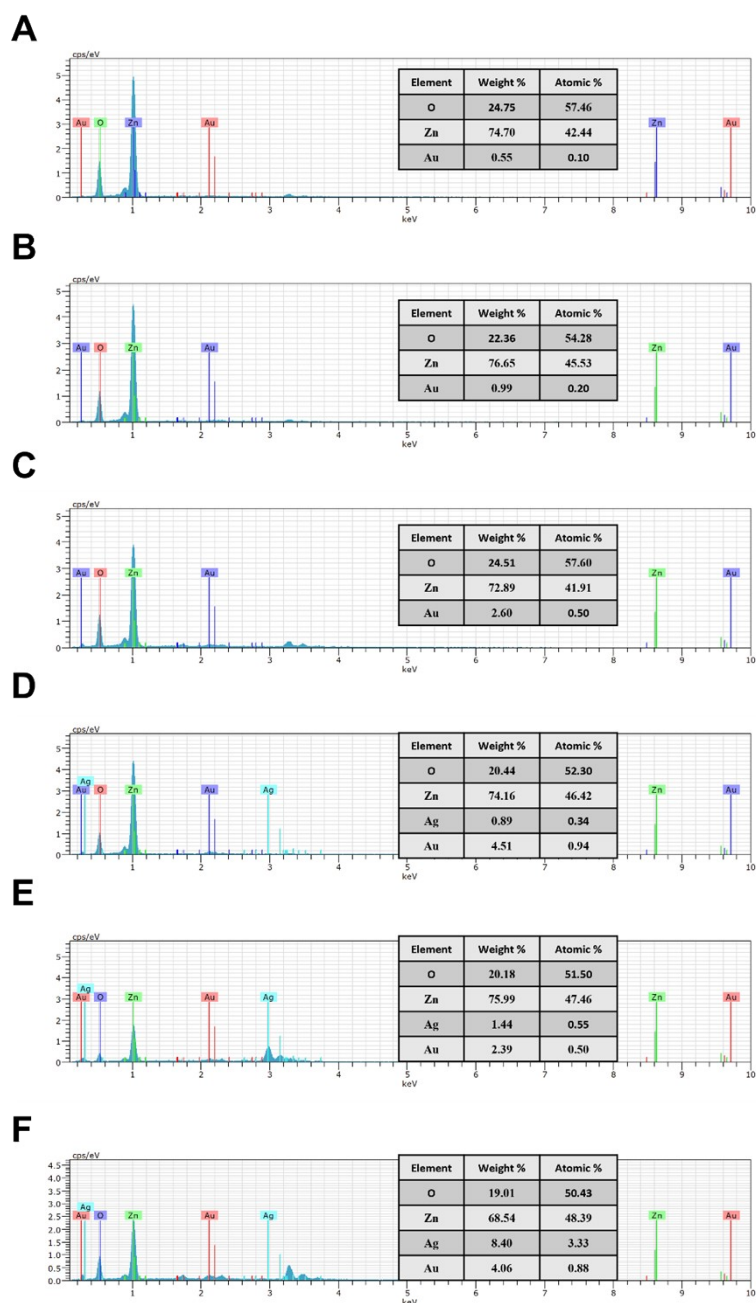

**Fig. S3. EDX spectrum of six-layer NMNPs on ZnONRs through scanning electron microscopy (SEM) analysis. (A) S-Au/ZnONRs, (B) AuNRs/S-Au/ZnONRs, (C) ULA/AuNRs/S-Au/ZnONRs, (D) S-Au-Ag(575)/ULA/AuNRs/S-Au/ZnONRs, (E) S-Au-Ag/S-Au-Ag(575)/ULA/AuNRs/S-Au/ZnONRs, and (F) S-Ag/S-Au-Ag/S-Au-Ag(575)/ULA/AuNRs/S-Au/ZnONRs.**

**Table S1. Measured cumulant diameter and zeta potential of 5 species of NMNPs suspended in the colloid.**

|                         | <b>Measured cumulant diameter (nm)</b> | <b>Measured zeta potential (mV)</b> |
|-------------------------|----------------------------------------|-------------------------------------|
| <b>AuNRs</b>            | <b>35.6</b>                            | <b>39.62</b>                        |
| <b>ULANPs</b>           | <b>75.4</b>                            | <b>-42.53</b>                       |
| <b>S-Au-AgNPs (575)</b> | <b>94.4</b>                            | <b>-41.74</b>                       |
| <b>S-Au-AgNPs (448)</b> | <b>132.7</b>                           | <b>21.36</b>                        |
| <b>S-AgNPs</b>          | <b>1532.2</b>                          | <b>-2.37</b>                        |
